# Supplementary material for: Proteomic Resistance Biomarkers for PI3K Inhibitor in Triple Negative Breast Cancer Patient-Derived Xenograft Models
Source: MDPI journal article supplement (doi:10.3390/cancers12123857), 2020-12-21
Supplement: s1 [file s1]

# Supplementary Materials: Proteomic Resistance Biomarkers for PI3K Inhibitor in Triple Negative Breast Cancer Patient-Derived Xenograft Models

Zhanfang Guo, Tina Primeau, Jingqin Luo, Cynthia Zhang, Hua Sun, Jeremy Hoog, Feng Gao, Shixia Huang, Dean P. Edwards, Sherri R. Davies, Rebecca Aft, Li Ding, Matthew J. Ellis, Shunqiang Li and Cynthia X. Ma

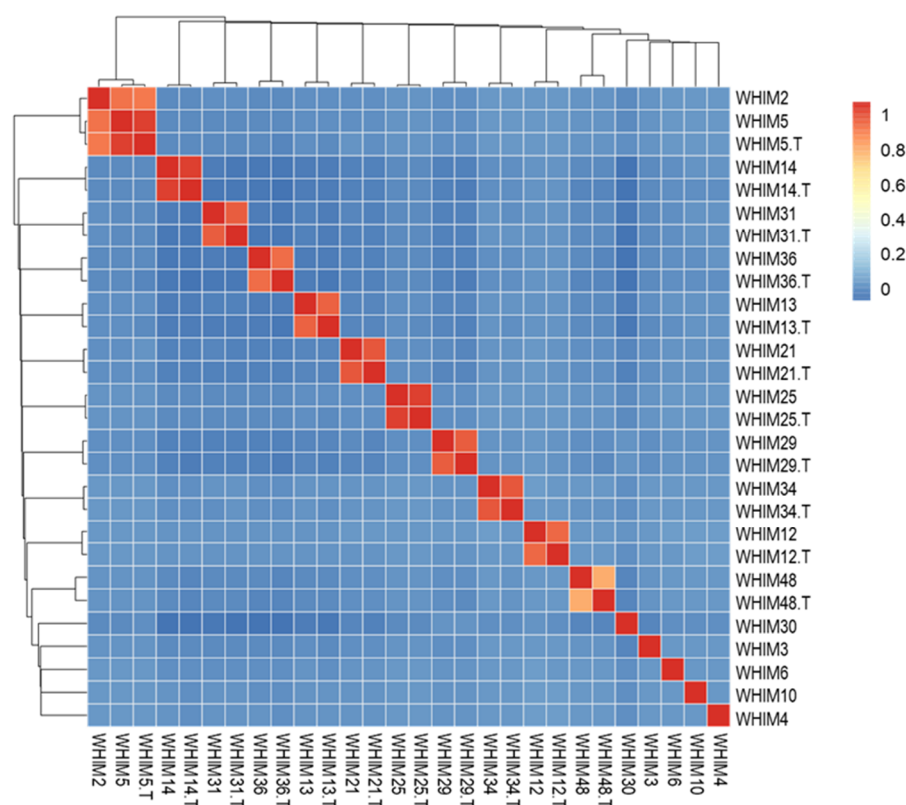

**Figure S1.** Correlation of somatic mutations between PDX samples and human tumor samples. The color scale on the right means pearson correlation coefficient. The sample name with "T" means human tumor sample.

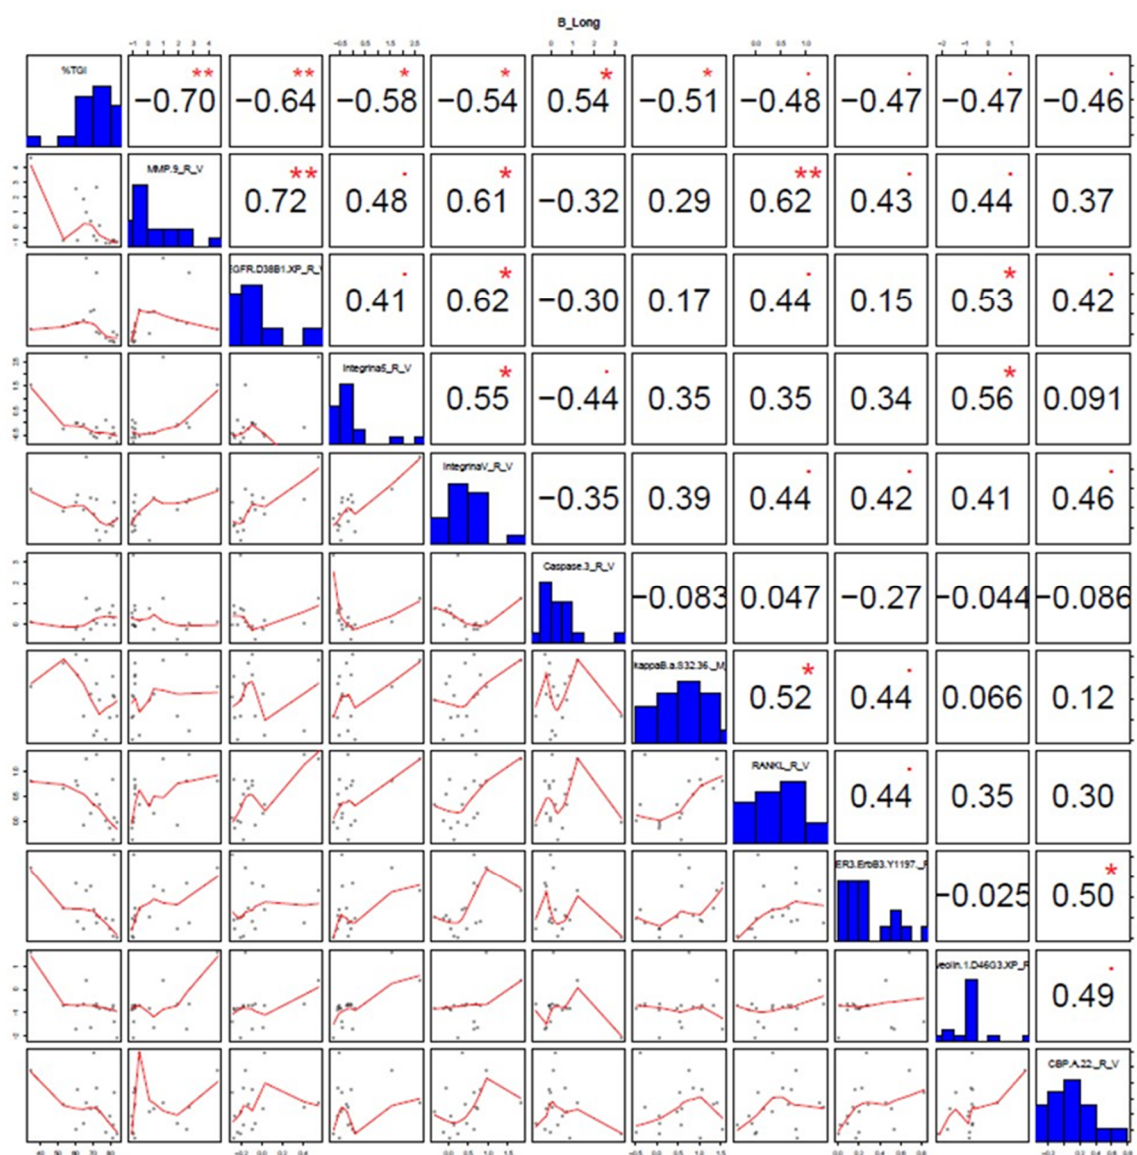

**Figure S2.** Correlation of baseline tumor RPPA protein markers with %TGI. Spearman Correlation of baseline protein levels with %TGI is indicated for each marker.

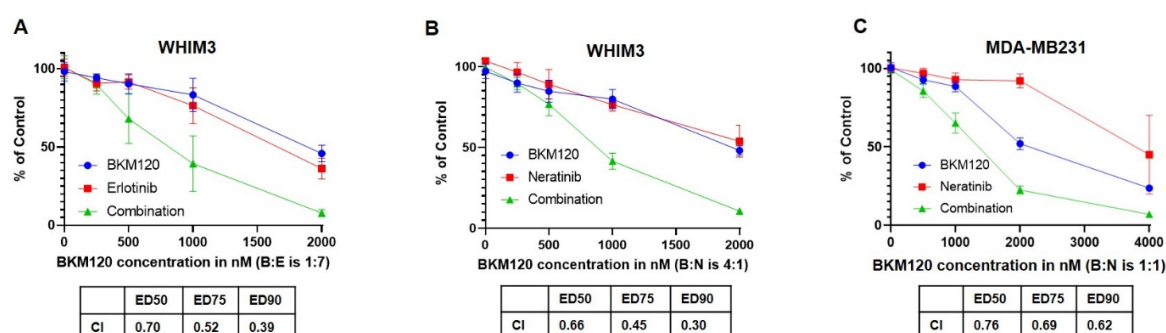

**Figure S3.** Synergistic cytotoxic effect of BKM120 in combination with an EGFR inhibitor in TNBC cell lines in vitro. % cell survival compared to control as measured by Alamar Blue following 6 days of treatment with increasing concentrations of BKM120 and erlotinib in WHIM3 (Panel A), BKM120 and neratinib in WHIM3 (Panel B) or MDA-MB 231 (Panel C), either alone or in combination, are shown. X axis indicates the concentrations of BKM120. The indicated EGFR inhibitor is tested at fixed drug concentration ratio in relation to BKM120. The combination index was shown for each combination at ED50, ED75 and ED90. BKM120; E, erlotinib; N, neratinib.

**Table S1.** Clinical Characteristics of Patients Corresponding to TNBC PDX Models.

| PDX ID | Age (Race) | Tissue source (*stage providing samples) | *Path stage at diagnosis | DFS (mon.) | OS (mon.) | Patient treatment history                                               |                            |
|--------|------------|------------------------------------------|--------------------------|------------|-----------|-------------------------------------------------------------------------|----------------------------|
|        |            |                                          |                          |            |           | Pre Engraftment                                                         | Post Engraftment           |
| WHIM2  | 44 (AA)    | Breast (cIIIA)                           | IIIA                     | 5.7        | 11        | None                                                                    | AC-T (neo)                 |
| WHIM3  | 62 (CA)    | Breast (IV)                              | IV                       | NA         | 3.4       | None                                                                    | Gem                        |
| WHIM4  | 49 (AA)    | Skin (IV)                                | pCR                      | 4          | 37        | AC-TH (neo), Dox/Gem/H, Cap, D/Bev                                      | D/Bev                      |
| WHIM5  | 44 (AA)    | Brain (IV)                               | IIIA                     | 5.7        | 11        | AC, T                                                                   | None                       |
| WHIM6  | 50 (AA)    | Breast (IV)                              | IV                       | NA         | 36        | None                                                                    | FEC, T, Cap, Dox, Gem, Nav |
| WHIM10 | 52 (CA)    | Skin (IV)                                | IA                       | 11         | 48        | FEC (adj), T (adj)                                                      | Bev/D, Bev/T               |
| WHIM12 | 65 (CA)    | Breast (IIB)                             | IIB                      | 9.6        | 12        | None                                                                    | FEC, T, Bev, Carb          |
| WHIM13 | 42 (CA)    | Skin (IV)                                | IIA                      | 8          | 45        | AC-D (neo), T/Bev                                                       | Cap, Dox, T/Bev            |
| WHIM14 | 41 (CA)    | Skin (IV)                                | IIB                      | 25         | 38.9      | FEC-T (neo)                                                             | None                       |
| WHIM21 | 64 (CA)    | Breast (IIB)                             | IIB                      | 0.9        | 8         | AC-T (neo)                                                              | Cap, Ixa                   |
| WHIM25 | 49 (AA)    | Skin (IV)                                | IIIC                     | 1          | 16        | T/Bev-AC/Bev (neo)                                                      | UCN-01/Irinotecan          |
| WHIM29 | 46 (CA)    | Breast (IV)                              | IV                       | NA         | 2         | None                                                                    | None                       |
| WHIM30 | 35 (CA)    | Breast (cIII)                            | pCR                      | >75        | >82       | None                                                                    | pCR to AC, T               |
| WHIM31 | 48 (CA)    | Skin (IV)                                | IIIA                     | 80         | 115       | AC-D (adj), Carb/T, Ana, Tam, Ful, Cap/Bev, Nav/Gem, Carb/Gem, CMF, Eri | A                          |
| WHIM34 | 53 (CA)    | Skin (IV)                                | IIA                      | 56         | 65        | None                                                                    | T                          |
| WHIM36 | 43 (CA)    | Skin (IV)                                | IIIC                     | 13         | 42        | AC (neo), T (adj), Iniparib/Carb/Gem                                    | Cap, C                     |
| WHIM48 | 49 (CA)    | LN (IV)                                  | III                      | 18         | 37.8      | TAC (adj), Cap, T/Bev, Eri, CM                                          | None                       |

DFS, time from breast surgery to recurrence; OS, time from diagnosis to death; c, clinical; \*staging is per AJCC version 7; AA, African American; CA, Caucasian American; LN, lymph node; neo, Neoadjuvant; adj, Adjuvant; NA, not applicable; A, Adriamycin; C, Cyclophosphamide, T, Paclitaxel; Gem, Gemcitabine; Cap, Capecitabine; Dox, Doxil; D, Docetaxel; Bev, Bevacizumab; Nav, Navelbine; E, Epirubicine; F, 5-FU; Carb, Carboplatin; Ixa, ixabepilone; H, Herceptin; Ana, Anastrozole; Ful, Fulvestrant; Eri, Eribulin; Tam, Tamoxifen; M, methotrexate.

**Table S2.** TNBC Subtypes of PDX models.

| PDX ID | Human Tumor | PDX Passage |     |     |     |     |
|--------|-------------|-------------|-----|-----|-----|-----|
|        |             | 1           | 2   | 3   | 4   | 5   |
| WHIM2  | MSL         | LAR         |     | LAR |     |     |
| WHIM3  |             |             | BL2 |     |     |     |
| WHIM4  | BL1         | BL1         |     | BL1 | BL1 | BL1 |
| WHIM5  | M           | UNS         |     | UNS |     | UNS |
| WHIM6  | IM          | IM          |     | BL2 |     | BL2 |
| WHIM10 |             | BL1         |     | BL1 | BL1 |     |
| WHIM12 | IM          | MSL         |     | UNS |     |     |
| WHIM13 | M           | M           | M   |     |     |     |
| WHIM14 | M           |             | M   |     |     |     |
| WHIM21 | MSL         | BL1         | BL1 |     |     |     |
| WHIM25 | MSL         | BL1         |     |     |     |     |
| WHIM29 | UNS         | LAR         | LAR |     |     |     |
| WHIM30 |             | IM          |     |     |     |     |
| WHIM31 | BL2         | BL1         | BL1 |     |     |     |
| WHIM34 | M           |             |     |     |     | M   |
| WHIM36 | BL1         |             | BL1 |     |     |     |
| WHIM48 | IM          | M           |     |     |     |     |

UNS: unspecified; WHIM3, 10 and 30 had insufficient tumor RNA for microarray analysis.

**Table S3.** RPPA list of protein markers See attached excel spreadsheet.

**Table S4.** Significantly changed markers following treatment with BKM120 compared to vehicle.

| Biomarkers            | Average_<br>logFC | Average_<br>%Change | Average_<br>adj.P.Val.Ttest | Average_<br>Rank | Significant<br>WHIM models              | FisherCombined<br>TestP | FisherCombined<br>TestP_FDRadjusted |
|-----------------------|-------------------|---------------------|-----------------------------|------------------|-----------------------------------------|-------------------------|-------------------------------------|
| <b>p-Akt(S473)</b>    | -0.61             | -1.14               | 0.04                        | 22.5             | 2;3;4;5;6;12;14;20;21;25;29;30;31;34;48 | 8.39E-132               | 1.53E-129                           |
| <b>p-p70S6K(S371)</b> | -0.59             | -3.11               | 0.07                        | 37.7             | 2;3;6;10;13;14;20;21;25;29;30;31;34;48  | 9.70E-40                | 2.21E-38                            |
| <b>p-Akt(T308)</b>    | -0.49             | -1.25               | 0.09                        | 37.8             | 2;3;5;6;12;14;20;21;25;29;30;31;34;36   | 8.93E-76                | 8.12E-74                            |

Average\_logFC: LIMMA log2 fold change averaged across 17 PDX models. Average % change: % change=(group mean of BKM120-group mean of vehicle)/absolute (group mean of vehicle), averaged across 17 PDX models. Average\_adj.P.Val.Ttest: LIMMA FDR adjusted P value comparing BKM120 to Vehicle, averaged across 17 WHIM lines. Significant WHIM models: the WHIM line where the protein was significant in LIMMA analysis. FisherCombinedTestP and FisherCombinedTestP\_FDRadjusted P: the Fisher's combined P value was calculated across WHIM lines using the raw and FDR-adjusted P values, respectively.

**Table S5.** Baseline PI3K protein markers by RPPA in correlation to %TGI.

| Protein Markers | SpearmanCorr2TGI | P value  |
|-----------------|------------------|----------|
| Akt             | −0.375           | 0.138717 |
| p-Akt(S473)     | −0.30147         | 0.238965 |
| p-Akt(T308)     | −0.33824         | 0.184211 |
| p70S6K          | −0.18382         | 0.478639 |
| p-p70S6K(T412)  | −0.1348          | 0.605275 |
| p-p70S6K(S371)  | −0.05882         | 0.824102 |
| p-mTOR(S2448)   | −0.28186         | 0.272097 |
| mTOR            | −0.29412         | 0.251066 |
| PTEN            | 0.139706         | 0.59201  |

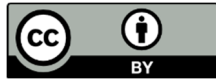

© 2020 by the authors. Submitted for possible open access publication under the terms and conditions of the Creative Commons Attribution (CC BY) license (<http://creativecommons.org/licenses/by/4.0/>).
